# Supplementary material
Source: MDPI journal article supplement (https://www.mdpi.com/2073-4344/13/2/368)
Supplement: s1 [file s1 › catalysts-2148150-supplementary.pdf]

## Stability Enhancement of Aldehyde Dehydrogenase from *Anoxybacillus geothermalis* Strain D9 Immobilized onto Seplite LX120

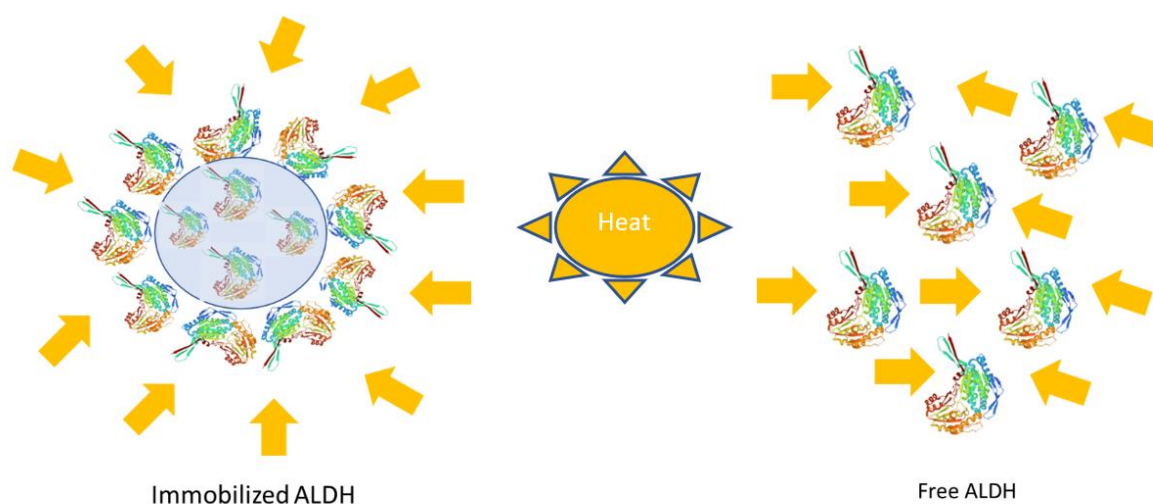

Figure S1. Schematic Diagram: How immobilization is able to enhance the thermostability of the ALDH toward temperature.
